# Supplementary material for: Increasing rates of urinary and bloodstream infections following transrectal prostate biopsy in South Sweden
Source: PubMed Central journal article supplement — BJU Int. 2022 Mar 8;130(4):478–85. doi: 10.1111/bju.15713 (PMC9541606; doi:10.1111/bju.15713), 2022-03-08

**Supplementary material**

**Table S1. A copy of the questionnaire translated from Swedish.**

After the biopsy, did you notice (circle your answer)

1. Fever above 38°C?                      YES      NO
2. Increased problems with discharge of urine      YES      NO  
urgency, burning sensation of pain?

The following question are only to be completed if you answered YES to question 1 or 2.

3. Did you see a doctor for these symptoms?      YES      NO
4. Did you receive antibiotics for your symptoms?      YES      NO
5. What antibiotics?.....  
For how many days?.....

6. Were you admitted to a hospital?                      YES      NO

if YES, where?.....and when?.....

**Table S2.** Logistic regression model of the primary outcome.

|                        | Bivariate       |                    | Multivariate |                    |            |
|------------------------|-----------------|--------------------|--------------|--------------------|------------|
|                        | Outcome         | OR (95% CI)        | <i>p</i>     | OR (95% CI)        | <i>p</i>   |
| <b>Age</b>             | -               | 0.99 (0.97-1.01)   | .16          | 0.99 (0.97-1.01)   | .19        |
| <b>Time Period</b>     |                 |                    |              |                    |            |
| 2003-2007              | 33/2218 (1.5%)  | 1                  |              | 1                  |            |
| 2008-2012              | 51/2798 (1.8%)  | 1.23 (0.80-1.93)   | .36          | 1.20 (0.74 – 1.98) | .47        |
| 2013-2017              | 103/3957 (2.6%) | 1.77 (1.21-2.67)   | <b>.005</b>  | 1.78 (1.14 – 2.87) | <b>.01</b> |
| <b>PSA</b>             |                 |                    |              |                    |            |
| < 3                    | 10/494 (2.1%)   | 0.84 (0.41-1.54)   | .61          | 1.02 (0.47 – 1.94) | .95        |
| 3-10                   | 111/5258 (2.0%) | 1                  |              | 1                  |            |
| 10-20                  | 37/1817 (2.0%)  | 0.97 (0.65 – 1.41) | .88          | 1.03 (0.69 – 1.52) | .88        |
| >20                    | 29/1387 (2.1%)  | 0.95 (0.60 – 1.43) | .81          | 1.32 (0.80 – 2.11) | .26        |
| <b>Volume</b>          |                 |                    |              |                    |            |
| 0-40                   | 77/4355 (1.8%)  | 1                  |              | 1                  |            |
| 40-100                 | 95/4143 (2.3%)  | 1.30 (0.96-1.77)   | .09          | 1.28 (0.94 – 1.77) | .12        |
| ≥100                   | 10/298 (3.4%)   | 1.93 (0.93-3.59)   | .054         | 1.88 (0.88 – 3.64) | .08        |
| <b>Biopsy cores</b>    |                 |                    |              |                    |            |
| 0-6                    | 25/1825 (1.4%)  | 1                  |              | 1                  |            |
| 7-10                   | 117/5444 (2.2%) | 1.58 (1.04 – 2.50) | <b>.04</b>   | 1.48 (0.91 – 2.51) | .13        |
| ≥11                    | 44/1696 (2.6%)  | 1.92 (1.18 – 3.19) | <b>.01</b>   | 1.51 (0.85 – 2.72) | .17        |
| <b>Prophylaxis</b>     |                 |                    |              |                    |            |
| Standard               | 148/7141(2.1%)  | 1                  |              | 1                  |            |
| Prolonged/other        | 38/1795 (2.1%)  | 1.02 (0.70 – 1.45) | .91          | 0.91(0.62 – 1.32)  | .64        |
| <b>Repeated biopsy</b> |                 |                    |              |                    |            |
| first                  | 142/6507 (2.2%) | 1                  |              | 1                  |            |
| repeated               | 45/2466 (1.8%)  | 0.83 (0.59 – 1.16) | .29          | 0.74 (0.51 – 1.04) | .09        |
| <b>PSA density</b>     |                 |                    |              |                    |            |
| <0.10                  | 35/1347 (2.6%)  | ref                |              | NA                 |            |
| 0.10 – 0.15            | 46/1845 (2.5%)  | 0.96 (0.62 – 1.50) | 0.85         | NA                 |            |
| > 0.15                 | 101/5595 (1.8%) | 0.69 (0.47 – 1.03) | 0.06         | NA                 |            |

**Table S3.** Results of the questionnaires during the study period 2003–2017.

|                                    | <i>no infection, n = 8786</i> | <i>infection, n = 187</i> |
|------------------------------------|-------------------------------|---------------------------|
| Questionnaires submitted           | 4786 (55%)                    | 109 (58%)                 |
| Side effect reported*              | 887 (17%)                     | 102 (94%)                 |
| Fever*                             | 114 (2%)                      | 88 (81%)                  |
| Urinary urgency*                   | 413 (8%)                      | 64 (55%)                  |
| Saw a doctor within 2 weeks*       | 142 (3%)                      | 89 (76%)                  |
| Prescribed additional antibiotics* | 122 (2%)                      | 82 (70%)                  |

\* The denominator for percentage is submitted questionnaires

**Table S4.** Subgroup analysis of the final period 2013-2017 divided into two terms.

|                                              | <b>2013-2014</b>  | <b>2015-2017</b> |
|----------------------------------------------|-------------------|------------------|
| <b>Biopsies performed, n</b>                 | 1696              | 2261             |
| <b>Blood culture taken (%)</b>               | 55 (3)            | 65 (3)           |
| - Positive blood                             | 29 (2)            | 26 (1)           |
| <b>Urine culture taken (%)</b>               | 57 (3)            | 83 (4)           |
| - Positive urine                             | 18 (1,0)          | 30 (1,3)         |
| <b>Age, median years (range)</b>             | 67 (28-96)        | 67 (31-95)       |
| <b>Prophylaxis, n (%)</b>                    |                   |                  |
| Single dose ciprofloxacin                    | 1354 (80)         | 1597 (71)        |
| Extended course of ciprofloxacin             | 313 (19)          | 629 (28)         |
| Other type of antibiotic                     | 29 (2)            | 35 (2)           |
| Missing, n                                   | -                 | -                |
| <b>Positive nitrite, n (%)</b>               | 33 (1)            | 32 (1)           |
| Missing, n                                   | -                 | -                |
| <b>PSA level, median µg/l (range)</b>        | 7.70 (0.11-23666) | 7.1 (0.1-17000)  |
| Missing, n                                   | -                 | 2                |
| <b>Volume of prostate, median ml (range)</b> | 39 (1-300)        | 42 (1-999)       |
| Missing, n                                   | 30                | 43               |
| <b>T-Stage, n (%)</b>                        |                   |                  |
| T0/T1                                        | 1198 (71)         | 1453 (64)        |
| T2-T4                                        | 498 (29.4)        | 808 (36)         |
| Missing, n                                   | -                 | -                |
| <b>Biopsies cores taken, median (range)</b>  | 10 (1-18)         | 10 (1-22)        |
| Missing, n                                   | -                 | 1                |

**Figure S1.** Annual trends for total number of biopsies, covariates and the primary outcome (blood and/or urine positivity rate). *p* values are from Mann-Kendall tests for continuous variables and from Cochran-Armitage tests for proportions.

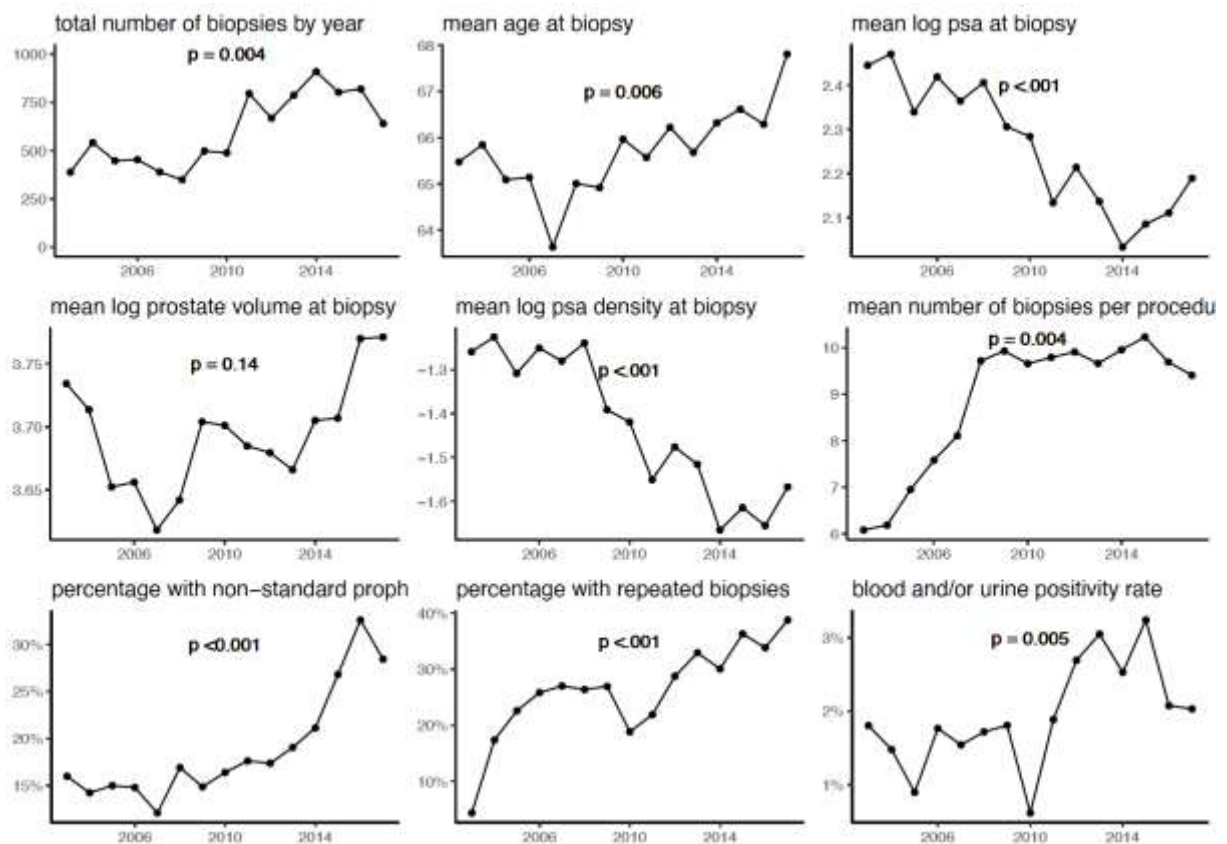

Supplement: BJU-130-478-s001.pdf [file BJU-130-478-s001.pdf]
